# Supplementary material
Source: PubMed Central journal article supplement (PMC3647436)
Supplement: supp_126.7.1576_JCS114371.pdf [file supp_126.7.1576_JCS114371.pdf]

GLUT-4            NH<sub>2</sub>-TMD-            486    TPSLLLEQEVKPSTELEYLG<sub>P</sub> 505  
 Gap1                NH<sub>2</sub>-TMD-            573    DLDLLKQEIAEEKAIMATK<sub>P</sub> 593

**Fig. S1.** The C-terminal cytosolic domains of GLUT4 and Gap1 contain acidic clusters membrane-distal to the dileucine motifs that are required for their regulated trafficking. Clusters of acidic amino acid residues membrane distal to their respective dileucine signals (spaced by 5-8 residues) have previously been identified in GLUT4, IRAP and PC6B (Shewan et al., 2000, *Biochem J.* 350, 99-107). The above alignment shows that the C-terminal cytosolic tail of Gap1 also contains this feature (underlined). Position of the trans membrane domain (TMD) is indicated.

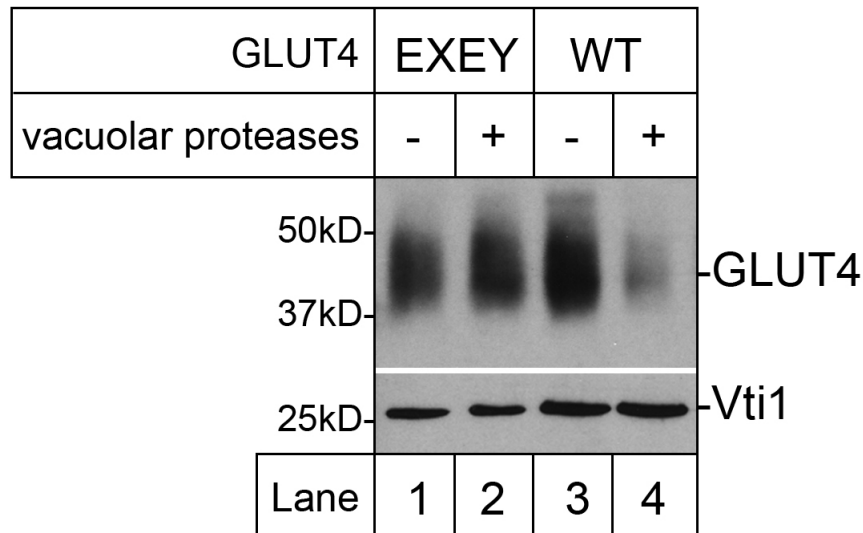

**Fig. S2.** Endosomal sorting of GLUT4 in yeast requires the C-terminal acidic motif. Mutation of E<sub>499</sub>, E<sub>501</sub> and Y<sub>502</sub> to A (to create GLUT4-EXEY) has previously demonstrated a role for the ELEY motif in the intracellular sequestration of GLUT4 by regulating transport between endosomes and the TGN (Shewan et al., 2003, *Mol Biol Cell.* 14, 973-986). We introduced these same mutations in the context of our yeast expression vector (pCAL4) and used immunoblot analysis to compare the levels of EXEY-GLUT4 to those of wild-type (WT) GLUT4 expressed in yeast cells containing (+) or lacking (-) active vacuolar proteases (RPY10 and SF838-9D) grown in media containing ammonium sulphate as a nitrogen source. Lysates from these cells were immunoblotted for GLUT4 and Vti1 (loading control). In contrast to wild-type GLUT4, which gets degraded by vacuolar proteases when expressed in cells grown on a rich source of nitrogen such as ammonium sulphate (Lamb et al., 2010, *Traffic.* 11, 1445-1454. and Figs 1, 2 and 3 of this study), EXEY-GLUT4 is not degraded under these conditions (compare lanes 2 and 4).

**Table S1. Sequences of the C-terminal cytosolic tails of GLUT4 and Gap1.**

*S. cerevisiae* Gap1 (residues 548- 602)

KIYKRNWKLFI~~P~~AEKMDIDTGRREVDLDLLKQEIAEEKAIMATKPRWYRIWN  
FWC – COOH

Human GLUT4 (residues 471-509)

TRGR~~T~~FDQISAAFHRT~~P~~SLLEQEVK~~P~~STELEYL~~G~~PDEND – COOH

**N.B.** The sequence of this portion of mouse GLUT4 is identical with the exception of residue 484: H in human, R in mouse).

Genbank accession numbers: Human GLUT4, NP\_001033.1; mouse GLUT4, NP\_033230.2; Gap1, CAA82113.1.
